# Supplementary material for: Genome-wide identification, interaction of the MADS-box proteins in Zanthoxylum armatum and functional characterization of ZaMADS80 in floral development
Source: Front Plant Sci. 2022 Nov 25;13:1038828. doi: 10.3389/fpls.2022.1038828 (PMC9732391; doi:10.3389/fpls.2022.1038828)
Supplement: Supplementary file 8 [file Table_1.docx]

**Supplementary Table S1. The primers used in this study**

| **EXP Type** | **Gene name** | **Forward/reverse primer (5’-3’)** |
| --- | --- | --- |
| Overexpression | ZaMADS80 | ATACTTCCAACTAGTGCGGCCGCATGGGGAGGGGAAAGATTGAG |
| ATGGTCATCCCGGGACCTGCAGGTTACCCAAGATGAAGTGTCTTTTTGTC |
| ZaMADS92 | ATACTTCCAACTAGTGCGGCCGCATGGGAAGAGGCAAGATTGAGATA |
| ATGGTCATCCCGGGACCTGCAGGCTAGTATGTTCTAGCCTGTTTGTTG |
| **EXP Type** | **Gene name** | **Forward/reverse primer (5’-3’)** |
| Yeast two-hybrid | AD-ZaMADS40 | TGGAGGCCAGTGAATTCATGGGAAGAGGTAGGGTTCAG |
| TCGAGCTCGATGGATCCCTAGCGAAGCATCCGTGTGA |
| AD-ZaMADS42 | TGGAGGCCAGTGAATTCATGGCGTTTCCAAATGAATTGGC |
| TCGAGCTCGATGGATCCTTAAACAAACCGAAGGGCCATCT |
| AD-ZaMADS48 | TGGAGGCCAGTGAATTCATGGCTAGAGGAAAGATCCAGAT |
| TCGAGCTCGATGGATCCTTAGTTAGGCTGCAGGCGTAT |
| AD-ZaMADS50 | TGGAGGCCAGTGAATTCATGGGGAGAGGGAGAGTTGA |
| TCGAGCTCGATGGATCCTCAAAGCATCCATCCTGGGATG |
| AD-ZaMADS54 | TGGAGGCCAGTGAATTCATGGGGAGGGGCAAAATAGAG |
| TCGAGCTCGATGGATCCTTACCCTAAATGCAAGGAAGTATCAG |
| AD-ZaMADS57 | TGGAGGCCAGTGAATTCATGAACGAAGAACTCACTTCCATTTTC |
| TCGAGCTCGATGGATCCTCAAACGAGCTGGAGAGGGA |
| AD-ZaMADS67 | TGGAGGCCAGTGAATTCATGGGACGGGGGAAGATAG |
| TCGAGCTCGATGGATCCCTAGATATTGGGATCCTGAAGG |
| AD-ZaMADS70 | TGGAGGCCAGTGAATTCATGAAGCCAATTGAGACGTTTTTTAG |
| TCGAGCTCGATGGATCCTCACACTTGGTCCTGAGTGAC |
| AD-ZaMADS74 | TGGAGGCCAGTGAATTCATGGGAAGGGGAAGAGTGGA |
| TCGAGCTCGATGGATCCTCAAAGCATCCACTCTGGAATG |
| AD-ZaMADS75 | TGGAGGCCAGTGAATTCATGCAAGAGACATACAGGAAATTGAAG |
| TCGAGCTCGATGGATCCAGATTCATTTAGATCGAGTTGAGATATTG |
| AD-ZaMADS89 | TGGAGGCCAGTGAATTCATGGCAAGAGAGAAGATCAAGATC |
| TCGAGCTCGATGGATCCTCAGTTGGAGAAGGGAAGCC |
| AD-ZaMADS95 | TGGAGGCCAGTGAATTCATGCTCTTGCAATATCATAAAAACCAC |
| TCGAGCTCGATGGATCCTCAGTTATGCAGCGACATTGG |
| BD-ZaMADS40 | CATGGAGGCCGAATTCATGGGAAGAGGTAGGGTTCAG |
| GCAGGTCGACGGATCCCTAGCGAAGCATCCGTGTGA |
| BD-ZaMADS42 | CATGGAGGCCGAATTCATGGCGTTTCCAAATGAATTGGC |
| GCAGGTCGACGGATCCTTAAACAAACCGAAGGGCCATCT |
| BD-ZaMADS50 | CATGGAGGCCGAATTCATGGGGAGAGGGAGAGTTGA |
| GCAGGTCGACGGATCCTCAAAGCATCCATCCTGGGATG |
| BD-ZaMADS50R2 | GCAGGTCGACGGATCCATTTCATCCAGCTTTATTGTCAAAGCT |
| BD-ZaMADS70 | CATGGAGGCCGAATTCATGAAGCCAATTGAGACGTTTTTTAG |
| GCAGGTCGACGGATCCTCACACTTGGTCCTGAGTGAC |
| BD-ZaMADS70R2 | GCAGGTCGACGGATCCTCAACCTTTGTCTGAGGTTCTTATTT |
| BD-ZaMADS80 | CATGGAGGCCGAATTCATGGGGAGGGGAAAGATTGAG |
| GCAGGTCGACGGATCCTTACCCAAGATGAAGTGTCTTTTTGTC |
| BD-ZaMADS89 | CATGGAGGCCGAATTCATGGCAAGAGAGAAGATCAAGATC |
| GCAGGTCGACGGATCCTCAGTTGGAGAAGGGAAGCC |
| BD-ZaMADS92 | CATGGAGGCCGAATTCATGGGAAGAGGCAAGATTGAGAT |
| GCAGGTCGACGGATCCCTAAATAGGCTGCATGTTGAAAGTG |
| **EXP Type** | **Gene name** | **Forward/reverse primer (5’-3’)** |
| BIFC | ZaMADS40 | AGTGGTCTCTGTCCAGTCCTATGGAAAAGATACTGGAACGCTAC |
| GGTCTCAGCAGACCACAAGTGCGAAGCATCCGTGTGAG |
| ZaMADS67 | AGTGGTCTCTGTCCAGTCCTATGGGACGGGGGAAGATAG |
| GGTCTCAGCAGACCACAAGTGATATTGGGATCCTGAAGGTTG |
| ZaMADS75 | AGTGGTCTCTGTCCAGTCCTATGCAAGAGACATACAGGAAATTGAAG |
| GGTCTCAGCAGACCACAAGTAGATTCATTTAGATCGAGTTGAGATATTGA |
| ZaMADS80 | AGTGGTCTCTGTCCAGTCCTATGGGGAGGGGAAAGATTGAG |
| GGTCTCAGCAGACCACAAGTCCCAAGATGAAGTGTCTTTTTGTC |
