# Supplementary material for: Genome-wide identification, interaction of the MADS-box proteins in Zanthoxylum armatum and functional characterization of ZaMADS80 in floral development
Source: Front Plant Sci. 2022 Nov 25;13:1038828. doi: 10.3389/fpls.2022.1038828 (PMC9732391; doi:10.3389/fpls.2022.1038828)
Supplement: Supplementary file 10 [file DataSheet_1.xlsx]

## Sheet: flower
Supplementary Table S3.Identification of differentially expressed MADS-box during flower development in Zanthoxylum armatum
Gene Name	MFS1-1_count	MFS1-1_FPKM	MFS1-2_count	MFS1-2_FPKM	MFS1-3_count	MFS1-3_FPKM	MFS2-1_count	MFS2-1_FPKM	MFS2-2_count	MFS2-2_FPKM	MFS2-3_count	MFS2-3_FPKM	MFS3-1_count	MFS3-1_FPKM	MFS3-2_count	MFS3-2_FPKM	MFS3-3_count	MFS3-3_FPKM	MFS1-1_MFS1-2_MFS1-3_count	MFS1-1_MFS1-2_MFS1-3_FPKM	MFS2-1_MFS2-2_MFS2-3_count	MFS2-1_MFS2-2_MFS2-3_FPKM	MFS3-1_MFS3-2_MFS3-3_count	MFS3-1_MFS3-2_MFS3-3_FPKM	MFS1-1_MFS1-2_MFS1-3_vs_MFS2-1_MFS2-2_MFS2-3_DESeq2_FDR	MFS1-1_MFS1-2_MFS1-3_vs_MFS2-1_MFS2-2_MFS2-3_DESeq2_log2FC	MFS1-1_MFS1-2_MFS1-3_vs_MFS2-1_MFS2-2_MFS2-3_DESeq2_(FDR_0.01_FC_2)_regulated	MFS1-1_MFS1-2_MFS1-3_vs_MFS3-1_MFS3-2_MFS3-3_DESeq2_FDR	MFS1-1_MFS1-2_MFS1-3_vs_MFS3-1_MFS3-2_MFS3-3_DESeq2_log2FC	MFS1-1_MFS1-2_MFS1-3_vs_MFS3-1_MFS3-2_MFS3-3_DESeq2_(FDR_0.01_FC_2)_regulated	KEGG_annotation	Pfam_annotation	Swissprot_annotation	TrEMBL_annotation	nr_annotation
ZaMADS9	78	7.25	62	6.29	59	5.29	109	11.03	95	8.84	94	9.35	21	1.88	36	2.39	23	2.38	66.33	6.28	99.33	9.74	26.67	2.22	2.70788e-05	0.935143	normal	4.43294e-05	-1.26059	down	K12412|5.9e-52|cit:107177971|K12412 pheromone receptor transcription factor | (RefSeq) agamous-like MADS-box protein AGL61	SRF-type transcription factor (DNA-binding and dimerisation domain)	MADS-box transcription factor 47 OS=Oryza sativa subsp. japonica OX=39947 GN=MADS47 PE=1 SV=3	MADS-box domain-containing protein OS=Citrus clementina OX=85681 GN=CICLE_v10022548mg PE=4 SV=1	agamous-like MADS-box protein AGL61 [Citrus sinensis]
ZaMADS88	1	0.14	1	0.15	2	0.26	1	0.15	1	0.14	1	0.15	19	2.39	30	2.88	22	3.21	1.33	0.18	1	0.15	23.67	2.83	--	--	--	1.8889e-07	3.51881	up	K12412|5.9e-25|mesc:110630814|K12412 pheromone receptor transcription factor | (RefSeq) agamous-like MADS-box protein AGL61	SRF-type transcription factor (DNA-binding and dimerisation domain)	Agamous-like MADS-box protein AGL61 OS=Arabidopsis thaliana OX=3702 GN=AGL61 PE=1 SV=1	MADS-box domain-containing protein OS=Citrus clementina OX=85681 GN=CICLE_v10018138mg PE=4 SV=1	agamous-like MADS-box protein AGL28 [Citrus clementina]
ZaMADS90	2	0.44	1	0.11	1	0.1	4	0.95	5	0.53	3	0.33	29	3.67	15	1.1	29	5.1	1.33	0.22	4	0.6	24.33	3.29	--	--	--	--	--	--	K19995|1.2e-24|bdi:100825352|K19995 secretory carrier-associated membrane protein | (RefSeq) uncharacterized LOC100825352	SRF-type transcription factor (DNA-binding and dimerisation domain)	Agamous-like MADS-box protein AGL80 OS=Arabidopsis thaliana OX=3702 GN=AGL80 PE=1 SV=1	MADS-box domain-containing protein OS=Citrus clementina OX=85681 GN=CICLE_v10013728mg PE=4 SV=1	agamous-like MADS-box protein AGL80 [Citrus sinensis]
ZaMADS92	1476	116.49	1551	130.93	1665	121.23	2519	211.65	2201	173.59	2409	198.27	2857	202.62	3465	186.66	2352	194.31	1564	122.88	2376.33	194.5	2891.33	194.53	6.80167e-45	0.975342	normal	1.06694e-43	0.923699	normal	K09264|3.6e-84|cit:102623916|K09264 MADS-box transcription factor, plant | (RefSeq) floral homeotic protein GLOBOSA isoform X1	SRF-type transcription factor (DNA-binding and dimerisation domain);; K-box region	Floral homeotic protein PMADS 2 OS=Petunia hybrida OX=4102 GN=PMADS2 PE=2 SV=1	Uncharacterized protein OS=Citrus sinensis OX=2711 GN=CISIN_1g042044mg PE=4 SV=1	floral homeotic protein GLOBOSA isoform X1 [Citrus sinensis]
ZaMADS95	1384	110.94	1244	106.28	1604	122.03	301	28.12	292	25.85	356	32.74	252	19.41	339	19.77	189	17.5	1410.67	113.08	316.33	28.9	260	18.89	9.17921e-85	-1.77477	down	9.0209e-142	-2.40471	down	K09264|1.8e-18|cic:CICLE_v10016427mg|K09264 MADS-box transcription factor, plant | (RefSeq) hypothetical protein	K-box region;; SRF-type transcription factor (DNA-binding and dimerisation domain)	MADS-box protein SOC1 OS=Arabidopsis thaliana OX=3702 GN=SOC1 PE=1 SV=1	Uncharacterized protein OS=Citrus unshiu OX=55188 GN=CUMW_063950 PE=4 SV=1	SOC1-like protein 1 [Citrus sinensis]
ZaMADS96	172	14.37	159	14.04	205	16.11	109	8.71	69	5.28	92	7.31	57	4.33	71	4.09	42	4.1	178.67	14.84	90	7.1	56.67	4.17	0.00217967	-0.600904	normal	5.46874e-16	-1.6058	down	K09264|1.4e-34|sbi:8057680|K09264 MADS-box transcription factor, plant | (RefSeq) MADS-box transcription factor 17	SRF-type transcription factor (DNA-binding and dimerisation domain);; K-box region	MADS-box protein AGL42 OS=Arabidopsis thaliana OX=3702 GN=AGL42 PE=1 SV=1	Uncharacterized protein OS=Citrus unshiu OX=55188 GN=CUMW_058200 PE=4 SV=1	hypothetical protein CUMW_058200 [Citrus unshiu]
ZaMADS97	57	6.62	90	11.01	101	11.14	10	1.28	19	2.52	15	1.79	26	2.88	59	4.73	32	3.72	82.67	9.59	14.67	1.86	39	3.78	2.73172e-09	-2.02679	down	0.000356057	-1.04797	down	K09264|9.5e-13|cit:102630220|K09264 MADS-box transcription factor, plant | (RefSeq) MADS-box transcription factor 23-like isoform X4	K-box region	Agamous-like MADS-box protein AGL16 OS=Arabidopsis thaliana OX=3702 GN=AGL16 PE=1 SV=1	AGAMOUS-like 16 OS=Prunus dulcis OX=3755 GN=Prudu_004569 PE=4 SV=1	MADS-box transcription factor 23-like isoform X3 [Citrus sinensis]
ZaMADS98	688	22.72	602	20.58	710	20.99	336	13.42	330	12.38	313	11.35	140	7.31	157	5.58	119	6.2	666.67	21.43	326.33	12.38	138.67	6.36	1.96329e-11	-0.65483	normal	9.29366e-75	-2.21402	down	K09264|3.7e-33|ppp:112281299|K09264 MADS-box transcription factor, plant | (RefSeq) MADS-box protein GGM13-like isoform X1	Arabidopsis protein of unknown function;; SRF-type transcription factor (DNA-binding and dimerisation domain);; K-box region	Agamous-like MADS-box protein AGL15 OS=Arabidopsis thaliana OX=3702 GN=AGL15 PE=1 SV=1	Uncharacterized protein OS=Citrus clementina OX=85681 GN=CICLE_v10032181mg PE=4 SV=1	hypothetical protein CICLE_v10032181mg [Citrus clementina]
ZaMADS89	582	55.86	458	47.65	553	46.92	140	15.62	165	17.69	138	15.16	58	4.82	76	6.78	75	9.03	531	50.14	147.67	16.16	69.67	6.88	7.99887e-31	-1.4652	down	3.7156e-73	-2.86123	down	K09264|9.2e-33|cit:102630220|K09264 MADS-box transcription factor, plant | (RefSeq) MADS-box transcription factor 23-like isoform X4	SRF-type transcription factor (DNA-binding and dimerisation domain);; K-box region	MADS-box protein AGL24 OS=Arabidopsis thaliana OX=3702 GN=AGL24 PE=1 SV=1	MADS-box protein JOINTLESS OS=Populus alba OX=43335 GN=D5086_0000196510 PE=4 SV=1	MADS-box protein SVP [Citrus sinensis]
ZaMADS94	267	20.24	280	22.65	291	20.41	186	15.01	203	15.33	203	16.04	264	18.06	313	16.31	191	15.23	279.33	21.1	197.33	15.46	256	16.53	0.35581	-0.130071	normal	0.519744	-0.0944217	normal	K09264|2.1e-88|cic:CICLE_v10021911mg|K09264 MADS-box transcription factor, plant | (RefSeq) hypothetical protein	K-box region	Agamous-like MADS-box protein MADS3 OS=Vitis vinifera OX=29760 GN=MADS3 PE=2 SV=1	Uncharacterized protein OS=Citrus sinensis OX=2711 GN=CISIN_1g037149mg PE=4 SV=1	agamous-like MADS-box protein AGL6 isoform X1 [Citrus clementina]
ZaMADS20	30	0.78	39	1.08	32	0.77	0	0	0	0	1	0.03	1	0.02	4	0.07	3	0.08	33.67	0.88	0.33	0.01	2.67	0.06	7.23884e-10	-4.22066	down	1.1474e-08	-3.26168	down	K09265|3.6e-60|qsu:112013387|K09265 transcription factor RLM1 | (RefSeq) myocyte-specific enhancer factor 2B-like	SRF-type transcription factor (DNA-binding and dimerisation domain)	Agamous-like MADS-box protein AGL15 OS=Arabidopsis thaliana OX=3702 GN=AGL15 PE=1 SV=1	Myocyte-specific enhancer factor 2A OS=Anthurium amnicola OX=1678845 GN=MEF2A_0 PE=4 SV=1	MADS-box transcription factor [Fusarium pseudocircinatum]
ZaMADS13	29	1.42	27	1.37	28	1.28	2	0.1	8	0.36	3	0.14	0	0	2	0.06	1	0.05	28	1.36	4.33	0.2	1	0.04	0.000111319	-2.05051	down	1.15704e-08	-3.94122	down	K12412|5.6e-48|qsu:111989741|K12412 pheromone receptor transcription factor | (RefSeq) transcription factor of morphogenesis MCM1-like	SRF-type transcription factor (DNA-binding and dimerisation domain)	Agamous-like MADS-box protein AGL13 OS=Arabidopsis thaliana OX=3702 GN=AGL13 PE=2 SV=2	MADS-box domain-containing protein OS=Carpinus fangiana OX=176857 GN=FH972_021472 PE=4 SV=1	hypothetical protein FGADI_10321 [Fusarium gaditjirri]
ZaMADS19	647	17.27	535	13.53	650	16.72	315	7.83	307	6.57	366	8.05	380	7.88	593	9.25	315	7.76	610.67	15.84	329.33	7.48	429.33	8.3	1.63165e-06	-0.514547	normal	5.82109e-06	-0.490641	normal	K18693|7.4e-18|pvu:PHAVU_008G008500g|K18693 diacylglycerol diphosphate phosphatase / phosphatidate phosphatase [EC:3.1.3.81 3.1.3.4] | (RefSeq) hypothetical protein	SRF-type transcription factor (DNA-binding and dimerisation domain)	Agamous-like MADS-box protein AGL82 OS=Arabidopsis thaliana OX=3702 GN=AGL82 PE=1 SV=1	MADS-box domain-containing protein OS=Citrus clementina OX=85681 GN=CICLE_v10009227mg PE=4 SV=1	hypothetical protein CICLE_v10009227mg [Citrus clementina]
ZaMADS57	294	18.71	283	18.46	283	16.92	681	41.48	707	41.56	669	41.9	950	50.11	1237	49.38	672	39.74	286.67	18.03	685.67	41.65	953	46.41	1.17352e-64	1.62262	up	1.5497e-59	1.74587	up	K09264|9.6e-116|cit:102622291|K09264 MADS-box transcription factor, plant | (RefSeq) agamous-like MADS-box protein AGL5	K-box region;; SRF-type transcription factor (DNA-binding and dimerisation domain)	Agamous-like MADS-box protein MADS1 OS=Vitis vinifera OX=29760 GN=MADS1 PE=2 SV=1	MADS6 protein OS=Citrus sinensis OX=2711 GN=MADS6 PE=2 SV=1	agamous-like MADS-box protein AGL5 isoform X3 [Citrus clementina]
ZaMADS48	2203	98.84	2008	95.96	2334	95.96	2506	118.49	2414	105.91	2677	123.06	1598	63.8	2048	62.13	1326	62.11	2181.67	96.92	2532.33	115.82	1657.33	62.68	1.62068e-23	0.588125	normal	1.15078e-08	-0.362155	normal	K09264|3.3e-80|cit:102609278|K09264 MADS-box transcription factor, plant | (RefSeq) floral homeotic protein DEFICIENS-like isoform X1	SRF-type transcription factor (DNA-binding and dimerisation domain);; K-box region	Agamous-like MADS-box protein AP3 OS=Vitis vinifera OX=29760 GN=AP3 PE=2 SV=1	Uncharacterized protein OS=Citrus clementina OX=85681 GN=CICLE_v10002410mg PE=4 SV=1	floral homeotic protein DEFICIENS [Citrus clementina]
ZaMADS50	1879	115.21	1779	114.98	2169	123.22	1996	132.97	1960	122.2	1910	124.09	2009	114.38	2807	121.35	1818	120.34	1942.33	117.8	1955.33	126.42	2211.33	118.69	7.45316e-11	0.384141	normal	0.0003961	0.21969	normal	K09264|1.8e-68|cic:CICLE_v10012593mg|K09264 MADS-box transcription factor, plant | (RefSeq) hypothetical protein	SRF-type transcription factor (DNA-binding and dimerisation domain);; K-box region	Agamous-like MADS-box protein MADS2 OS=Vitis vinifera OX=29760 GN=MADS2 PE=2 SV=2	Uncharacterized protein OS=Citrus clementina OX=85681 GN=CICLE_v10012593mg PE=4 SV=1	developmental protein SEPALLATA 1 [Citrus clementina]
ZaMADS61	200	12.6	256	15.63	258	15.27	117	8.06	123	7.2	118	7.17	631	40.68	810	40.63	436	31.88	238	14.5	119.33	7.48	625.67	37.73	0.000148899	-0.619272	normal	1.10158e-28	1.40801	up	K12412|1.1e-19|qsu:112030633|K12412 pheromone receptor transcription factor | (RefSeq) agamous-like MADS-box protein AGL62	SRF-type transcription factor (DNA-binding and dimerisation domain)	Agamous-like MADS-box protein AGL61 OS=Arabidopsis thaliana OX=3702 GN=AGL61 PE=1 SV=1	MADS-box domain-containing protein OS=Citrus unshiu OX=55188 GN=CUMW_124580 PE=4 SV=1	agamous-like MADS-box protein AGL61 [Citrus sinensis]
ZaMADS70	899	77.77	866	82.85	944	76.04	2325	219.18	2713	238.32	2691	246.31	4358	351.39	5317	327.46	3385	315.8	903	78.89	2576.33	234.6	4353.33	331.55	2.1636e-197	1.87997	up	1.0718e-251	2.29986	up	K17618|1.4e-25|egu:105036968|K17618 ubiquitin-like domain-containing CTD phosphatase 1 [EC:3.1.3.16] | (RefSeq) ubiquitin-like domain-containing CTD phosphatase	K-box region	Agamous-like MADS-box protein AGL9 homolog OS=Solanum lycopersicum OX=4081 GN=TDR5 PE=2 SV=1	MADS3 protein OS=Citrus sinensis OX=2711 GN=MADS3 PE=2 SV=1	MADS3 protein [Citrus sinensis]
ZaMADS72	648	37.4	676	40.83	740	38	939	62.47	1003	61.38	957	61.36	1135	63.63	1469	63	1048	67.59	688	38.74	966.33	61.74	1217.33	64.74	6.05679e-31	0.860064	normal	1.29526e-27	0.86138	normal	K19995|1.2e-19|bdi:100825352|K19995 secretory carrier-associated membrane protein | (RefSeq) uncharacterized LOC100825352	SRF-type transcription factor (DNA-binding and dimerisation domain)	Agamous-like MADS-box protein AGL80 OS=Arabidopsis thaliana OX=3702 GN=AGL80 PE=1 SV=1	Uncharacterized protein OS=Citrus sinensis OX=2711 GN=CISIN_1g026374mg PE=4 SV=1	uncharacterized protein LOC18038064 [Citrus clementina]
ZaMADS74	556	48.47	533	49.58	612	49.41	464	42.99	541	46.94	517	47.05	291	22.87	413	24.73	257	23.55	567	49.15	507.33	45.66	320.33	23.72	0.0240378	0.210643	normal	9.90003e-15	-0.792663	normal	K09264|1.5e-85|cit:102630708|K09264 MADS-box transcription factor, plant | (RefSeq) AGL62; MADS-box transcription factor 6	SRF-type transcription factor (DNA-binding and dimerisation domain);; K-box region	Agamous-like MADS-box protein MADS3 OS=Vitis vinifera OX=29760 GN=MADS3 PE=2 SV=1	Uncharacterized protein OS=Citrus unshiu OX=55188 GN=CUMW_058260 PE=4 SV=1	hypothetical protein CUMW_058260 [Citrus unshiu]
ZaMADS78	152	16.58	152	17.76	219	22.08	47	5.52	45	4.77	37	4.15	45	4.51	49	3.6	59	6.55	174.33	18.81	43	4.81	51	4.89	2.02758e-13	-1.60961	down	1.97321e-13	-1.67424	down	K09264|1.6e-14|pda:103704758|K09264 MADS-box transcription factor, plant | (RefSeq) MADS-box transcription factor 3 isoform X1	K-box region	Agamous-like MADS-box protein AGL19 OS=Arabidopsis thaliana OX=3702 GN=AGL19 PE=1 SV=1	K-box domain-containing protein (Fragment) OS=Citrus sinensis OX=2711 GN=CISIN_1g0283631mg PE=4 SV=1	agamous-like MADS-box protein AGL19 [Citrus clementina]
ZaMADS79	2	0.24	2	0.4	8	0.9	1	0.11	1	0.19	9	1.03	41	4.53	51	3.94	34	4.57	4	0.51	3.67	0.44	42	4.35	--	--	--	3.97258e-10	3.1723	up	K09264|1.4e-84|cit:102620453|K09264 MADS-box transcription factor, plant | (RefSeq) agamous-like MADS-box protein AGL11 isoform X4	K-box region;; SRF-type transcription factor (DNA-binding and dimerisation domain)	Agamous-like MADS-box protein AGL11 OS=Vitis vinifera OX=29760 GN=AGL11 PE=2 SV=1	Uncharacterized protein OS=Citrus unshiu OX=55188 GN=CUMW_213220 PE=4 SV=1	agamous-like MADS-box protein AGL11 isoform X4 [Citrus sinensis]
ZaMADS83	7	0.45	7	0.48	5	0.3	10	0.69	23	1.48	14	0.94	69	4.1	101	4.5	53	3.62	6.33	0.41	15.67	1.04	74.33	4.07	--	--	--	5.60612e-17	3.39233	up	K09264|4.4e-34|ghi:107898736|K09264 MADS-box transcription factor, plant | (RefSeq) MADS-box protein CMB1-like	SRF-type transcription factor (DNA-binding and dimerisation domain);; K-box region	Agamous-like MADS-box protein AGL12 OS=Arabidopsis thaliana OX=3702 GN=AGL12 PE=1 SV=2	Uncharacterized protein OS=Citrus clementina OX=85681 GN=CICLE_v10023354mg PE=4 SV=1	agamous-like MADS-box protein AGL12 [Citrus sinensis]

## Sheet: fruit
Supplementary Table S3.Identification of differentially expressed MADS-box during fruits development in Zanthoxylum armatum
Gene Name	sample_readcount(JYQFS1_1)	sample_readcount(JYQFS1_2)	sample_readcount(JYQFS1_3)	sample_readcount(JYQFS2_1)	sample_readcount(JYQFS2_2)	sample_readcount(JYQFS2_3)	sample_readcount(JYQFS3_1)	sample_readcount(JYQFS3_2)	sample_readcount(JYQFS3_3)	sample_readcount(JYQFS4_1)	sample_readcount(JYQFS4_2)	sample_readcount(JYQFS4_3)	sample_readcount(JYQFS5_1)	sample_readcount(JYQFS5_2)	sample_readcount(JYQFS5_3)	sample_readcount(JYQFS6_1)	sample_readcount(JYQFS6_2)	sample_readcount(JYQFS6_3)	sample_readcount(JYQFS7_1)	sample_readcount(JYQFS7_2)	sample_readcount(JYQFS7_3)	sample_readcount(JYQFS8_1)	sample_readcount(JYQFS8_2)	sample_readcount(JYQFS8_3)	NR Description	NT Description	KO Description	Swissprot Description	PFAM description	KOG Description	UP_DOWN_REGULATION(JYQFS4vsJYQFS1)	log2FC(JYQFS4vsJYQFS1)	q value(JYQFS4vsJYQFS1)	UP_DOWN_REGULATION(JYQFS3vsJYQFS1)	log2FC(JYQFS3vsJYQFS1)	q value(JYQFS3vsJYQFS1)	UP_DOWN_REGULATION(JYQFS2vsJYQFS1)	log2FC(JYQFS2vsJYQFS1)	q value(JYQFS2vsJYQFS1)
ZaMADS26	243	196	239.73	280	283	240.01	245	225.01	211.34	257	326	328	286.23	304	294	170	170	142	221	191	218	115	86	126	transcription factor [Dorcoceras hygrometricum]	Populus trichocarpa clone POP050-I22, complete sequence	MADS-box transcription factor, plant	Agamous-like MADS-box protein AGL8 homolog OS=Solanum commersonii OX=4109 GN=SCM1 PE=2 SV=1	SRF-type transcription factor (DNA-binding and dimerisation domain)	--	FALSE	0.39832	0.038838	FALSE	-0.063735	0.79264	FALSE	0.25481	0.099447
ZaMADS28	66.83	51.08	62.14	12.96	21.74	35.98	10	16.3	7	1	4.76	0	0	0	0	1	0	0	1	0	0	0	0	0	MADS-box protein SOC1, partial [Mucuna pruriens]	PREDICTED: Citrus sinensis SOC1-like protein 1 (LOC102577939), transcript variant X4, mRNA	-	Agamous-like MADS-box protein AGL14 OS=Arabidopsis thaliana OX=3702 GN=AGL14 PE=1 SV=2	SRF-type transcription factor (DNA-binding and dimerisation domain)	--	DOWN	-4.9338	3.1161e-11	DOWN	-2.5157	1.0323e-11	DOWN	-1.3286	0.00011783
ZaMADS32	17	15	23.65	48.63	38	32	95.47	102.29	92.02	135.82	148.99	181.79	114.71	143.93	111.82	192.72	181.8	196	135.55	124.83	143.46	66.42	31.03	73.55	Agamous-like MADS-box protein [Actinidia chinensis var. chinensis]	PREDICTED: Citrus clementina agamous-like MADS-box protein AGL9 homolog (LOC18045570), transcript variant X4, mRNA	MADS-box transcription factor, plant	MADS-box transcription factor 1 OS=Pisum sativum OX=3888 GN=MTF1 PE=2 SV=1	MYM-type Zinc finger with FCS sequence motif//SRF-type transcription factor (DNA-binding and dimerisation domain)	--	UP	3.0357	1.5887e-22	UP	2.3002	3.3736e-16	UP	1.0992	0.005658
ZaMADS34	147.01	187.59	192	32	19	23	2	4	1	0	0	0	0	1	0	0	6	2	0	0	1	0	0	2	MADS-box protein AGL42-like [Durio zibethinus]	PREDICTED: Daucus carota subsp. sativus MADS-box protein SOC1-like (LOC108217854), transcript variant X5, mRNA	-	MADS-box protein AGL42 OS=Arabidopsis thaliana OX=3702 GN=AGL42 PE=1 SV=1	SRF-type transcription factor (DNA-binding and dimerisation domain)	--	DOWN	-9.9292	4.1113e-15	DOWN	-6.305	4.2645e-27	DOWN	-2.8259	8.8574e-33
ZaMADS27	135.65	108.18	133.93	214	214.86	206.3	162	236	224.98	98	85	94.99	108	86	94	201	168	207	392	386	387	45	53	62	hypothetical protein CUMW_095940 [Citrus unshiu]	PREDICTED: Citrus sinensis truncated transcription factor CAULIFLOWER A (LOC102615519), mRNA	MADS-box transcription factor, plant	Agamous-like MADS-box protein FUL-L OS=Vitis vinifera OX=29760 GN=FULL PE=2 SV=1	SRF-type transcription factor (DNA-binding and dimerisation domain)	--	FALSE	-0.46989	0.087489	FALSE	0.65203	9.1045e-05	FALSE	0.76056	4.8408e-07
ZaMADS46	171.36	156.93	192.8	88.81	87.09	122.57	13	2	4	9	6	2	1	10	0	4	3	1	0	0	3	1	1	0	agamous-like MADS-box protein AGL19 [Citrus clementina]	PREDICTED: Capsella rubella agamous-like MADS-box protein AGL14 (LOC17884461), transcript variant X2, mRNA	-	Agamous-like MADS-box protein AGL19 OS=Arabidopsis thaliana OX=3702 GN=AGL19 PE=1 SV=1	SRF-type transcription factor (DNA-binding and dimerisation domain)//K-box region//TSC-22/dip/bun family	--	DOWN	-4.965	2.27e-31	DOWN	-4.8446	1.6414e-38	FALSE	-0.79028	7.9512e-06
ZaMADS47	670.52	652.2	754.87	241.51	203.06	270.55	63.69	73.7	70	30.1	22.24	24	12	16	27	39.95	12.03	20.89	10.27	4	9	0	2	4	MADS-box protein SOC1 [Citrus clementina]	PREDICTED: Citrus sinensis SOC1-like protein 1 (LOC102577939), transcript variant X4, mRNA	-	MADS-box protein SOC1 OS=Arabidopsis thaliana OX=3702 GN=SOC1 PE=1 SV=1	SRF-type transcription factor (DNA-binding and dimerisation domain)//bZIP transcription factor//Mitochondrial ATP synthase g subunit//K-box region	--	DOWN	-4.8007	1.0045e-121	DOWN	-3.3893	2.7655e-160	DOWN	-1.5279	4.2796e-56
ZaMADS51	16	7	6	28	27	31	27	17	17	10	5	8	6	18	13	0	3	1	0	2	1	4	1	1	agamous-like MADS-box protein AGL62 [Citrus clementina]	PREDICTED: Citrus sinensis agamous-like MADS-box protein AGL62 (LOC102622606), mRNA	-	Agamous-like MADS-box protein AGL61 OS=Arabidopsis thaliana OX=3702 GN=AGL61 PE=1 SV=1	SRF-type transcription factor (DNA-binding and dimerisation domain)	--	FALSE	-0.36542	0.82238	FALSE	1.003	0.10367	UP	1.5773	0.0016458
ZaMADS56	102	107.93	108	70	79	59	8	7	9	2.98	1	2	6	1	2	4	7	4	2	7	6	1	2	4	MADS-box protein SVP [Lansium domesticum]	PREDICTED: Citrus sinensis MADS-box protein JOINTLESS (LOC102609601), transcript variant X2, mRNA	MADS-box transcription enhancer factor 2A	MADS-box protein JOINTLESS OS=Solanum lycopersicum OX=4081 GN=J PE=1 SV=1	K-box region//Initiation control protein YabA	--	DOWN	-5.7581	2.6436e-17	DOWN	-3.7986	2.8274e-26	FALSE	-0.60103	0.0079553
ZaMADS59	18	14	14	58	55	40	171	178.48	174	647.97	529	592	152	126	186	151	170	187	252	292.92	256.99	181.01	102	139	hypothetical protein CICLE_v10016427mg [Citrus clementina]	PREDICTED: Citrus sinensis floral homeotic protein AGAMOUS (LOC102617808), transcript variant X3, mRNA	MADS-box transcription factor, plant	Floral homeotic protein AGAMOUS OS=Nicotiana tabacum OX=4097 GN=AG1 PE=2 SV=1	Ribosomal protein L7/L12 dimerisation domain//K-box region	--	UP	5.2361	2.0982e-94	UP	3.4373	5.4825e-39	UP	1.7446	1.8916e-06
ZaMADS60	212.01	213.42	232.42	232	212	219	303	318	304	342.06	281	279	188	231	219	160	217.94	185	327	299	319	259	150	175	hypothetical protein CICLE_v10032572mg [Citrus clementina]	PREDICTED: Citrus clementina developmental protein SEPALLATA 1 (LOC18044261), transcript variant X2, mRNA	MADS-box transcription factor, plant	MADS-box protein CMB1 OS=Dianthus caryophyllus OX=3570 GN=CMB1 PE=2 SV=1	K-box region//SRF-type transcription factor (DNA-binding and dimerisation domain)	--	FALSE	0.42799	0.015899	FALSE	0.42399	0.00035293	FALSE	0.022775	0.91348
ZaMADS64	1	0	1	0	0	1	0	1	0	0	0	0	65.88	73.17	56.46	222.28	163.86	176.02	68	70.52	61.81	23	94.67	30.18	hypothetical protein CUMW_100640 [Citrus unshiu]	PREDICTED: Citrus sinensis protein TRANSPARENT TESTA 16 (LOC102627966), transcript variant X3, mRNA	-	MADS-box protein FBP24 OS=Petunia hybrida OX=4102 GN=FBP24 PE=1 SV=1	K-box region//Spindle pole body component//SRF-type transcription factor (DNA-binding and dimerisation domain)	--	FALSE	-1.8607	0.82238	FALSE	-0.93973	0.90662	FALSE	-0.86004	0.90596
ZaMADS66	28	21	15	22.43	36.01	43	42	27	31.28	33.99	23	28.38	43.19	63.2	29	60	39	56	38	43	25.38	27	70	30	agamous-like MADS-box protein AGL15 [Citrus clementina]	PREDICTED: Citrus clementina agamous-like MADS-box protein AGL15 (LOC18043733), mRNA	MADS-box transcription factor, plant	--	Viral D10 N-terminal//Transcription factor TFIIH complex subunit Tfb5//Haemagglutinin//K-box region	--	FALSE	0.37563	0.64326	FALSE	0.5717	0.2295	FALSE	0.6693	0.16715
ZaMADS68	865.05	883.52	967.73	221	226.2	263.47	69.98	79	72	22	13	16	15	18	10	20	13.97	14	15	15	25	13	8	8	hypothetical protein CISIN_1g027691mg [Citrus sinensis]	PREDICTED: Pistacia vera MADS-box protein SOC1 (LOC116144024), transcript variant X8, mRNA	-	MADS-box protein SOC1 OS=Arabidopsis thaliana OX=3702 GN=SOC1 PE=1 SV=1	K-box region//SRF-type transcription factor (DNA-binding and dimerisation domain)	--	DOWN	-5.764	1.4141e-137	DOWN	-3.6894	2.0581e-213	DOWN	-1.9259	9.2685e-102
ZaMADS69	229	251	216	247	211	250	204	208	212	170	187	181	226	244	174	556	548	589.99	72	86	93	51	46	40	HbMADS-box protein [Hevea brasiliensis]	PREDICTED: Citrus sinensis agamous-like MADS-box protein AGL6 (LOC102613709), transcript variant X1, mRNA	MADS-box transcription factor, plant	Agamous-like MADS-box protein MADS3 OS=Vitis vinifera OX=29760 GN=MADS3 PE=2 SV=1	Testis development-related protein//K-box region//SRF-type transcription factor (DNA-binding and dimerisation domain)	--	FALSE	-0.40332	0.049246	FALSE	-0.22983	0.14315	FALSE	0.030518	0.90334
ZaMADS73	7	5	4	12	9	7	4	3	3	4	11	13	12	8	8	210	134	137	3	4	1	5	17	13	hypothetical protein CUMW_073790 [Citrus unshiu]	PREDICTED: Citrus clementina agamous-like MADS-box protein AGL80 (LOC18031321), mRNA	-	Agamous-like MADS-box protein AGL80 OS=Arabidopsis thaliana OX=3702 GN=AGL80 PE=1 SV=1	SRF-type transcription factor (DNA-binding and dimerisation domain)	--	FALSE	0.77946	0.5802	FALSE	-0.7501	0.62094	FALSE	0.81343	0.41653
ZaMADS76	350	307.41	332	228	204	281	86	132.09	93	66	46	68	35	51	32	21	38	28	73	48	44	22	21	31	MADS-box protein AGL42 [Citrus clementina]	PREDICTED: Citrus clementina MADS-box protein AGL42 (LOC18033048), mRNA	-	MADS-box protein AGL42 OS=Arabidopsis thaliana OX=3702 GN=AGL42 PE=1 SV=1	SRF-type transcription factor (DNA-binding and dimerisation domain)//K-box region	--	DOWN	-2.4864	2.4786e-37	DOWN	-1.739	2.6281e-35	FALSE	-0.46347	0.00036218
ZaMADS80	0	0	0	16.97	14	7	53.3	70.9	80	133.06	137.38	126.59	252.58	236.5	272.09	598.23	552.48	618.62	401.84	401.64	449.18	136.87	116.33	74.74	agamous-like MADS-box protein AGL11 isoform X1 [Citrus clementina]	PREDICTED: Citrus clementina agamous-like MADS-box protein AGL11 (LOC18049990), transcript variant X5, mRNA	-	Agamous-like MADS-box protein AGL11 OS=Vitis vinifera OX=29760 GN=AGL11 PE=3 SV=1	SRF-type transcription factor (DNA-binding and dimerisation domain)	--	UP	9.4613	1.075e-13	UP	8.459	2.9726e-11	UP	6.1152	3.0965e-05
ZaMADS82	315.64	350.12	305.45	141.82	150.91	115.95	3	9	5	5	1	0	1	0	0	0	1	2	0	0	0	1	0	0	agamous-like MADS-box protein AGL19 [Citrus clementina]	PREDICTED: Citrus clementina agamous-like MADS-box protein AGL19 (LOC18047162), transcript variant X4, mRNA	-	Agamous-like MADS-box protein AGL19 OS=Arabidopsis thaliana OX=3702 GN=AGL19 PE=1 SV=1	SRF-type transcription factor (DNA-binding and dimerisation domain)//K-box region	--	DOWN	-7.3712	2.633e-31	DOWN	-5.9088	9.3228e-56	DOWN	-1.2386	7.013e-19
ZaMADS85	167.35	150.82	168.07	175	188.14	198.7	104	139	162.02	62	72	36.01	23	27	47	54	52	55	97	125.99	100	22	9	26	truncated transcription factor CAULIFLOWER A [Citrus clementina]	PREDICTED: Citrus clementina truncated transcription factor CAULIFLOWER A (LOC18038919), mRNA	MADS-box transcription factor, plant	Agamous-like MADS-box protein FUL-L OS=Vitis vinifera OX=29760 GN=FULL PE=2 SV=1	Vitamin-D-receptor interacting Mediator subunit 4//Phage minor structural protein GP20//SRF-type transcription factor (DNA-binding and dimerisation domain)//Exonuclease VII, large subunit//K-box region	--	DOWN	-1.5449	4.5664e-09	FALSE	-0.33288	0.084283	FALSE	0.221	0.23571
ZaMADS29	299.05	292	305.87	159	149.97	166.01	220	187	208	152	136.53	122	185	205	195	157.98	155.03	180.99	315.83	334.95	321.84	157	129.03	142	agamous-like MADS-box protein AGL30 isoform X3 [Citrus sinensis]	PREDICTED: Citrus sinensis agamous-like MADS-box protein AGL30 (LOC102611222), transcript variant X3, mRNA	-	Agamous-like MADS-box protein AGL30 OS=Arabidopsis thaliana OX=3702 GN=AGL30 PE=1 SV=1	SRF-type transcription factor (DNA-binding and dimerisation domain)//K-box region	--	DOWN	-1.1557	5.7784e-12	FALSE	-0.61427	2.5459e-07	FALSE	-0.90787	4.746e-13
ZaMADS44	0	0	0	0	0	0	0	0	0	3	9	3	80	85	70	48	48	45	35	46	34	0	0	1	hypothetical protein CUMW_116600 [Citrus unshiu]	PREDICTED: Citrus sinensis MADS-box protein defh21-like (LOC102614986), transcript variant X3, mRNA	-	MADS-box protein defh21 OS=Antirrhinum majus OX=4151 GN=DEFH21 PE=2 SV=1	SRF-type transcription factor (DNA-binding and dimerisation domain)//K-box region	--	UP	4.7354	0.029846	FALSE	NA	NA	FALSE	NA	NA
ZaMADS49	0	0	0	13.03	22	14	55.7	71.1	68	110.94	92.62	95.41	205.42	234.5	220.91	548.77	553.52	679.38	566.16	541.36	593.82	239.13	121.67	90.26	agamous-like MADS-box protein AGL11 isoform X5 [Citrus clementina]	PREDICTED: Citrus clementina agamous-like MADS-box protein AGL11 (LOC18049990), transcript variant X6, mRNA	MADS-box transcription factor, plant	Agamous-like MADS-box protein AGL11 OS=Vitis vinifera OX=29760 GN=AGL11 PE=3 SV=1	K-box region//SRF-type transcription factor (DNA-binding and dimerisation domain)	--	UP	9.0518	2.0177e-12	UP	8.3942	4.1671e-11	UP	6.4913	3.9905e-06
ZaMADS53	635.99	609	662	1440	1214	1242	1770.59	1774.73	1707.46	1274.94	1403.36	1288.95	690	741	732	43	35.07	45	58	33	53.04	59.07	33	20	hypothetical protein CICLE_v10021357mg [Citrus clementina]	PREDICTED: Citrus sinensis MADS-box protein CMB1-like (LOC102611482), transcript variant X3, mRNA	MADS-box transcription factor, plant	Agamous-like MADS-box protein MADS2 OS=Vitis vinifera OX=29760 GN=MADS2 PE=2 SV=2	K-box region//SRF-type transcription factor (DNA-binding and dimerisation domain)	--	UP	1.0284	1.7234e-30	UP	1.3924	1.8944e-133	UP	1.0394	1.0666e-51
ZaMADS62	4	4	5	16	14	15	22	30	27	50	38	35	35	30	38	94	101	95	111	104	117.99	37	17	17	PREDICTED: agamous-like MADS-box protein AGL5 [Lupinus angustifolius]	PREDICTED: Citrus sinensis agamous-like MADS-box protein AGL5 (LOC102622291), mRNA	-	Agamous-like MADS-box protein AGL1 OS=Arabidopsis thaliana OX=3702 GN=AGL1 PE=1 SV=1	SRF-type transcription factor (DNA-binding and dimerisation domain)	--	UP	3.2131	2.7857e-07	UP	2.534	1.6857e-05	UP	1.8014	0.012473
ZaMADS65	341	281.07	291	160	140.96	113	80	69	82	65.02	56	87.86	72	46	80	146	114.03	129	77	87.98	88	9	36	39	MADS-box protein SVP [Lansium domesticum]	PREDICTED: Pistacia vera MADS-box protein SVP-like (LOC116146397), mRNA	MADS-box transcription enhancer factor 2A	MADS-box protein JOINTLESS OS=Solanum lycopersicum OX=4081 GN=J PE=1 SV=1	K-box region//Erythronolide synthase docking domain//Initiation control protein YabA	--	DOWN	-2.1553	4.7665e-26	DOWN	-2.0527	9.3424e-44	DOWN	-1.1315	1.6534e-15
ZaMADS77	314.07	342.18	349.04	128.11	109	120	25	27	26	49	31	26	10	11	10	24	39	31	4	23	8	3	3	3	hypothetical protein CICLE_v10022568mg [Citrus clementina]	PREDICTED: Citrus sinensis SOC1-like protein 1 (LOC102577939), transcript variant X4, mRNA	-	MADS-box protein SOC1 OS=Arabidopsis thaliana OX=3702 GN=SOC1 PE=1 SV=1	SRF-type transcription factor (DNA-binding and dimerisation domain)//K-box region	--	DOWN	-3.276	5.7588e-49	DOWN	-3.7581	9.7981e-81	DOWN	-1.4851	4.7681e-30
ZaMADS84	52	43	66.96	109	130	98	66.68	59	51	48	30	37	10	8	9	16	8	6	36	23	30	7	2	10	truncated transcription factor CAULIFLOWER A [Citrus clementina]	PREDICTED: Citrus clementina truncated transcription factor CAULIFLOWER A (LOC18038919), mRNA	MADS-box transcription factor, plant	Agamous-like MADS-box protein FUL-L OS=Vitis vinifera OX=29760 GN=FULL PE=2 SV=1	K-box region	--	FALSE	-0.51837	0.28327	FALSE	0.062525	0.90662	UP	1.0742	3.0076e-06
ZaMADS13	71	46	56.89	22	9	22	0	0	0	0	0	0	0	0	0	0	0	0	0	0	0	0	0	0	transcription factor of morphogenesis MCM1-like [Quercus suber]	Fusarium verticillioides 7600 MADS-box transcription factor, other eukaryote (FVEG_01965), mRNA	--	Transcription factor of morphogenesis MCM1 OS=Candida albicans (strain SC5314 / ATCC MYA-2876) OX=237561 GN=MCM1 PE=1 SV=1	SRF-type transcription factor (DNA-binding and dimerisation domain)//CDC45-like protein	Regulator of arginine metabolism and related MADS box-containing transcription factors	DOWN	-8.3269	3.1698e-10	DOWN	-8.3684	5.5812e-11	DOWN	-1.7096	1.5802e-06
ZaMADS45	11	10	5	26	9	26	29	27	33	42	59	50	91	84	109	74	92	96	52	75	53	26	28	22	truncated transcription factor CAULIFLOWER A-like isoform X4 [Citrus sinensis]	PREDICTED: Durio zibethinus agamous-like MADS-box protein AGL14 (LOC111305965), mRNA	-	MADS-box transcription factor 15 OS=Oryza sativa subsp. japonica OX=39947 GN=MADS15 PE=1 SV=2	SRF-type transcription factor (DNA-binding and dimerisation domain)	--	UP	2.5046	1.0982e-06	UP	1.7012	0.00047672	FALSE	1.2224	0.055391
ZaMADS48	1925	1902	2058	1606.01	1413	1556	1492	1705	1587	1163	1169	1060	1087	1156	1058	677	642	730	761	848	793	790	705	627.95	floral homeotic protein DEFICIENS [Citrus clementina]	PREDICTED: Citrus clementina floral homeotic protein DEFICIENS (LOC18042936), mRNA	MADS-box transcription factor, plant	Agamous-like MADS-box protein AP3 OS=Vitis vinifera OX=29760 GN=AP3 PE=2 SV=1	SRF-type transcription factor (DNA-binding and dimerisation domain)//Carboxypeptidase Y pro-peptide//K-box region	--	FALSE	-0.82379	8.6314e-27	FALSE	-0.36864	1.2266e-12	FALSE	-0.35431	2.6241e-11
ZaMADS50	552.89	557.97	507.98	938.97	974.14	936.56	1559.05	1739.93	1690.25	4228.33	4060.55	3992.71	2122.58	2299.77	2084.17	3390.24	3270.39	3435.66	2753.95	2945.91	2709.26	1812.59	1406.7	1481.09	developmental protein SEPALLATA 1-like [Citrus sinensis]	PREDICTED: Citrus sinensis developmental protein SEPALLATA 1-like (LOC102615242), mRNA	MADS-box transcription factor, plant	Agamous-like MADS-box protein MADS2 OS=Vitis vinifera OX=29760 GN=MADS2 PE=2 SV=2	SRF-type transcription factor (DNA-binding and dimerisation domain)//Type III secretion system, cytoplasmic E component of needle//Syntaxin 6, N-terminal//K-box region	--	UP	2.8925	4.182e-297	UP	1.5522	2.4936e-122	FALSE	0.82533	1.1029e-24
ZaMADS54	0	0	0	0	0	0	0	0	0	0	1	0	53	41	50.01	243	244	239	48	61	81	0	1	3	agamous-like MADS-box protein AGL18 isoform X2 [Citrus sinensis]	PREDICTED: Cajanus cajan agamous-like MADS-box protein AGL18 (LOC109792074), mRNA	-	Agamous-like MADS-box protein AGL18 OS=Arabidopsis thaliana OX=3702 GN=AGL18 PE=1 SV=1	K-box region//Phage integrase family//SRF-type transcription factor (DNA-binding and dimerisation domain)	--	FALSE	0.9325	0.89967	FALSE	NA	NA	FALSE	NA	NA
ZaMADS57	104	66	96	311.78	335.01	330	936	995.35	1103.12	1871.31	1440.36	1387.15	996.42	1041.02	1088.62	5282.17	5280.49	6386.66	1881.48	1984.83	1894.32	643.14	381.01	309.12	agamous-like MADS-box protein AGL5 isoform X1 [Citrus clementina]	PREDICTED: Citrus sinensis agamous-like MADS-box protein AGL5 (LOC102622291), mRNA	MADS-box transcription factor, plant	Agamous-like MADS-box protein MADS1 OS=Vitis vinifera OX=29760 GN=MADS1 PE=2 SV=1	SRF-type transcription factor (DNA-binding and dimerisation domain)//K-box region	--	UP	4.1152	2.868e-167	UP	3.4432	4.678e-195	UP	1.8909	1.79e-37
ZaMADS61	471	429	462	106	117	109	105	108	80	69	63	55	83	92	84	82	92	77	96	98	87	197	167	226	agamous-like MADS-box protein AGL61 [Citrus sinensis]	PREDICTED: Citrus clementina agamous-like MADS-box protein AGL61 (LOC18037731), mRNA	-	Agamous-like MADS-box protein AGL61 OS=Arabidopsis thaliana OX=3702 GN=AGL61 PE=1 SV=1	SRF-type transcription factor (DNA-binding and dimerisation domain)//Plasmid recombination enzyme	--	DOWN	-2.8936	2.1169e-64	DOWN	-2.2863	4.486e-75	DOWN	-2.0256	1.7599e-61
ZaMADS67	0	0	0	0	1	0	0	0	0	4	7	9	220.12	227.83	223.54	696.72	780.14	776.98	298	313.48	309.19	84	231.33	140.82	hypothetical protein CICLE_v10032489mg [Citrus clementina]	PREDICTED: Citrus sinensis protein TRANSPARENT TESTA 16 (LOC102627966), transcript variant X3, mRNA	-	MADS-box protein FBP24 OS=Petunia hybrida OX=4102 GN=FBP24 PE=1 SV=1	K-box region//SRF-type transcription factor (DNA-binding and dimerisation domain)	--	UP	5.1535	0.0074559	FALSE	NA	NA	FALSE	0.97149	0.90334
ZaMADS70	229.11	169.06	232	631	535.21	627.26	1472.01	1458.63	1377.13	2301.09	1792.71	1748.5	1774.4	1825.9	1937.54	3036.04	3069.11	3260.97	3130.78	3020.72	2999.88	1601.51	964.66	1157.88	hypothetical protein CICLE_v10032507mg [Citrus clementina]	PREDICTED: Citrus sinensis agamous-like MADS-box protein AGL9 homolog (LOC102618932), transcript variant X2, mRNA	-	Agamous-like MADS-box protein MADS4 OS=Vitis vinifera OX=29760 GN=MADS4 PE=2 SV=2	RHO protein GDP dissociation inhibitor//K-box region//Type III secretion system, cytoplasmic E component of needle//Copper fist DNA binding domain//Zinc finger, C3HC4 type (RING finger)	--	UP	3.1862	2.3192e-145	UP	2.7055	1.057e-237	UP	1.5194	1.5944e-47
ZaMADS72	349	277	365	314.25	329.48	350	437	447	440.16	341	367	321.57	432	396	440	804	800	932	373	382	390	399	371	433	agamous-like MADS-box protein AGL8 homolog [Citrus sinensis]	PREDICTED: Citrus sinensis agamous-like MADS-box protein AGL8 homolog (LOC102630456), mRNA	-	Agamous-like MADS-box protein AGL80 OS=Arabidopsis thaliana OX=3702 GN=AGL80 PE=1 SV=1	Potassium channel Kv1.4 tandem inactivation domain//SRF-type transcription factor (DNA-binding and dimerisation domain)	--	FALSE	0.029952	0.90232	FALSE	0.35044	0.00079457	FALSE	0.01621	0.92937
ZaMADS74	325	318	358	460	405	465	483	489	514	218	160	156	78	74	89	16	22	27	27	42	60	19	11	7	hypothetical protein CUMW_058260 [Citrus unshiu]	PREDICTED: Citrus sinensis MADS-box transcription factor 6 (AGL62), mRNA	MADS-box transcription factor, plant	Agamous-like MADS-box protein MADS3 OS=Vitis vinifera OX=29760 GN=MADS3 PE=2 SV=1	K-box region//Cell division protein ZapB//Vitamin-D-receptor interacting Mediator subunit 4//TSC-22/dip/bun family//SRF-type transcription factor (DNA-binding and dimerisation domain)//bZIP transcription factor//Adenovirus E1B 19K protein / small t-antigen	--	FALSE	-0.93564	4.5188e-08	FALSE	0.50075	5.7098e-08	FALSE	0.4193	3.9824e-05
ZaMADS78	188.08	160.95	185.95	104.37	102	124.48	33.98	23.19	15	5.83	10	1	2	0	9.06	4	0	1	2.02	3	0.93	0	2.09	1.07	agamous-like MADS-box protein AGL19 [Citrus clementina]	PREDICTED: Citrus sinensis agamous-like MADS-box protein AGL19 (LOC102626103), transcript variant X7, mRNA	-	Agamous-like MADS-box protein AGL19 OS=Arabidopsis thaliana OX=3702 GN=AGL19 PE=1 SV=1	Mitochondrial ATP synthase g subunit//Transposase DDE domain//SRF-type transcription factor (DNA-binding and dimerisation domain)//Death domain//Initiation control protein YabA//Integral membrane protein EMC3/TMCO1-like//K-box region//TSC-22/dip/bun family	--	DOWN	-5.004	1.0253e-31	DOWN	-2.9617	1.15e-37	FALSE	-0.68651	3.5479e-05
ZaMADS79	0	0	0	1	0	5	27	40	25	80	34	41	78	82	72	143	172	203	150	144	120	96	49	29	agamous-like MADS-box protein AGL11 isoform X1 [Citrus sinensis]	PREDICTED: Citrus clementina agamous-like MADS-box protein AGL11 (LOC18049990), transcript variant X5, mRNA	-	Agamous-like MADS-box protein AGL11 OS=Vitis vinifera OX=29760 GN=AGL11 PE=3 SV=1	K-box region//Two-component Enterococcus faecalis cytolysin (EFC)//RNA polymerase recycling family C-terminal//Ribosomal protein L7/L12 dimerisation domain	--	UP	8.1013	2.1908e-09	UP	7.3104	3.1342e-08	FALSE	3.4324	0.4134
ZaMADS83	5	8	4	9	12	11	12	27	11	17	8	13	45	22	41	12	5	12	35	23	14	55	30	22	agamous-like MADS-box protein AGL12 isoform X2 [Citrus clementina]	PREDICTED: Citrus sinensis agamous-like MADS-box protein AGL12 (LOC102624609), mRNA	-	Agamous-like MADS-box protein AGL12 OS=Arabidopsis thaliana OX=3702 GN=AGL12 PE=1 SV=2	SRF-type transcription factor (DNA-binding and dimerisation domain)//K-box region	--	FALSE	1.1211	0.29804	UP	1.479	0.036794	FALSE	0.91927	0.30668
ZaMADS42	36	45	41	154	158	147	392	372	359	1357.06	1400	1452.72	526	488.43	505	476	494	606	581	590	613	409.99	367	449	hypothetical protein CUMW_013630 [Citrus unshiu]	PREDICTED: Citrus sinensis floral homeotic protein AGAMOUS (LOC102617808), transcript variant X3, mRNA	MADS-box transcription factor, plant	Floral homeotic protein AGAMOUS OS=Nicotiana tabacum OX=4097 GN=AG1 PE=2 SV=1	SRF-type transcription factor (DNA-binding and dimerisation domain)	--	UP	5.08	3.1931e-219	UP	3.1323	3.0355e-78	UP	1.9216	1.4351e-20

## Sheet: flower and fruit
Supplementary Table S3.Identification of differentially expressed MADS-box during flowers and fruits development in Zanthoxylum armatum
Gene Name	FFS_count	MFS_count	FFS_tpm	MFS_tpm	Log2fc	Pvalue	Padjust	Significant	regulate	Nr	Swissprot
ZaMADS25	0	132	0	2.97	7.81402	7.96391e-28	3.61903e-27	yes	up	gi|985440352|ref|XP_015384054.1|( PREDICTED: agamous-like MADS-box protein AGL104 isoform X4 [Citrus sinensis])	gi|75335186|sp|Q9LM46.1|AG104_ARATH(RecName: Full=Agamous-like MADS-box protein AGL104)
ZaMADS43	1784.74	4451.85	210.55	475.72	1.08832	5.17777e-177	1.25814e-175	yes	up	gi|987996491|ref|NP_001306995.1|( agamous-like MADS-box protein AGL9 homolog [Citrus sinensis])	gi|3913002|sp|Q42464.1|AGL9_SOLLC(RecName: Full=Agamous-like MADS-box protein AGL9 homolog; AltName: Full=TM5)
ZaMADS67	677	97	22.84	3.21	-3.03347	1.32399e-125	2.31507e-124	yes	down	gi|567890173|ref|XP_006437607.1|( hypothetical protein CICLE_v10032489mg [Citrus clementina])	gi|27151496|sp|Q9ATE5.1|FBP24_PETHY(RecName: Full=MADS-box protein FBP24; AltName: Full=Floral-binding protein 24)
ZaMADS101	51	227	1.92	8.45	1.92375	1.17078e-22	4.52807e-22	yes	up	gi|572153050|ref|NP_001275772.1|( SOC1-like protein 1 [Citrus sinensis])	gi|17433202|sp|O64645.1|SOC1_ARATH(RecName: Full=MADS-box protein SOC1; AltName: Full=Agamous-like MADS-box protein AGL20; AltName: Full=Protein SUPPRESSOR OF CONSTANS OVEREXPRESSION 1)
ZaMADS102	3470	7800.96	174.07	353.08	0.938345	3.9789e-242	1.29009e-240	no	up	gi|641863170|gb|KDO81856.1|( hypothetical protein CISIN_1g047287mg [Citrus sinensis])	gi|3913002|sp|Q42464.1|AGL9_SOLLC(RecName: Full=Agamous-like MADS-box protein AGL9 homolog; AltName: Full=TM5)
ZaMADS80	1679.95	6	67.01	0.27	-8.35961	0	0	yes	down	gi|568848864|ref|XP_006478206.1|( PREDICTED: agamous-like MADS-box protein AGL11 isoform X1 [Citrus sinensis])	gi|12229648|sp|Q38836.1|AGL11_ARATH(RecName: Full=Agamous-like MADS-box protein AGL11; AltName: Full=Protein SEEDSTICK)
ZaMADS53	932	1972	35.04	67.77	0.850886	2.2176e-53	1.76773e-52	no	up	gi|567896632|ref|XP_006440804.1|( hypothetical protein CICLE_v10021357mg [Citrus clementina])	gi|26454603|sp|P29382.2|SEP1_ARATH(RecName: Full=Developmental protein SEPALLATA 1; AltName: Full=Agamous-like MADS-box protein AGL2)
ZaMADS84	144	323.01	6.25	12.75	0.935139	1.56461e-11	3.58313e-11	no	up	gi|567876723|ref|XP_006430951.1|( hypothetical protein CICLE_v10012594mg [Citrus clementina])	gi|3912999|sp|Q40170.1|AGL8_SOLLC(RecName: Full=Agamous-like MADS-box protein AGL8 homolog; AltName: Full=TM4)
ZaMADS35	234	414.99	5.22	8.43	0.596197	2.38349e-07	3.91265e-07	no	up	gi|568857759|ref|XP_006482432.1|( PREDICTED: truncated transcription factor CAULIFLOWER A-like isoform X2 [Citrus sinensis])	gi|3913001|sp|Q42429.1|AGL8_SOLTU(RecName: Full=Agamous-like MADS-box protein AGL8 homolog; AltName: Full=POTM1-1)
ZaMADS75	0	192	0	9.09	8.35459	1.00529e-37	5.94459e-37	yes	up	gi|567865881|ref|XP_006425563.1|( hypothetical protein CICLE_v10026433mg [Citrus clementina])	gi|729974|sp|Q07472.1|MADS1_PETHY(RecName: Full=Floral homeotic protein PMADS 1; AltName: Full=Green petal homeotic protein)
ZaMADS40	179	479	6.66	19.02	1.18969	1.61997e-23	6.4432e-23	yes	up	gi|567890711|ref|XP_006437876.1|( hypothetical protein CICLE_v10032490mg [Citrus clementina])	gi|3913047|sp|Q41276.1|AP1_SINAL(RecName: Full=Floral homeotic protein APETALA 1; AltName: Full=MADS C)
ZaMADS49	374.99	1	40.06	0.12	-8.78108	3.05057e-80	3.51823e-79	yes	down	gi|568848868|ref|XP_006478208.1|( PREDICTED: agamous-like MADS-box protein AGL11 isoform X3 [Citrus sinensis])	gi|12229648|sp|Q38836.1|AGL11_ARATH(RecName: Full=Agamous-like MADS-box protein AGL11; AltName: Full=Protein SEEDSTICK)
ZaMADS77	18	296	3.54	52.41	3.80916	1.87335e-57	1.59817e-56	yes	up	gi|572153050|ref|NP_001275772.1|( SOC1-like protein 1 [Citrus sinensis])	gi|17433202|sp|O64645.1|SOC1_ARATH(RecName: Full=MADS-box protein SOC1; AltName: Full=Agamous-like MADS-box protein AGL20; AltName: Full=Protein SUPPRESSOR OF CONSTANS OVEREXPRESSION 1)
ZaMADS81	1	5134.39	0.06	202.79	12.0956	0	0	yes	up	gi|568837684|ref|XP_006472853.1|( PREDICTED: floral homeotic protein GLOBOSA isoform X1 [Citrus sinensis])	gi|729976|sp|Q07474.1|MADS2_PETHY(RecName: Full=Floral homeotic protein PMADS 2)
ZaMADS79	153.55	0	12.95	0	-8.49294	5.41996e-35	3.00493e-34	yes	down	gi|641823342|gb|KDO42758.1|( hypothetical protein CISIN_1g045191mg, partial [Citrus sinensis])	gi|12229648|sp|Q38836.1|AGL11_ARATH(RecName: Full=Agamous-like MADS-box protein AGL11; AltName: Full=Protein SEEDSTICK)
